# Supplementary material for: The Combined Effect of Polygenic Risk Score and Prostate Health Index in Chinese Men Undergoing Prostate Biopsy
Source: MDPI journal article supplement (doi:10.3390/jcm12041343), 2023-02-08
Supplement: s1 [file s1]

# Supplementary materials

**Table S1.** Final 102 SNPs used in East Asian specific PRS.

| SNP         | CHR | Position  | Risk allele | Ref allele | OR (East Asian association) | P value  | Status | PMID     |
|-------------|-----|-----------|-------------|------------|-----------------------------|----------|--------|----------|
| rs2134688   | 1   | 150772613 | A           | G          | 1.09                        | 3.88E-04 | Proxy  | 33398198 |
| rs10127983  | 1   | 153923276 | T           | C          | 1.07                        | 6.50E-04 | AVL    | 33398198 |
| rs56103503  | 1   | 154980351 | T           | C          | 1.06                        | 4.92E-02 | AVL    | 33398198 |
| rs80237341  | 1   | 157119915 | C           | G          | 1.17                        | 2.37E-07 | AVL    | 33398198 |
| rs6660538   | 1   | 163295678 | A           | C          | 1.07                        | 6.63E-04 | AVL    | 33398198 |
| rs4075646   | 1   | 167135941 | T           | A          | 1.07                        | 2.04E-04 | AVL    | 33398198 |
| rs613185    | 1   | 179897070 | G           | A          | 1.10                        | 2.70E-05 | Proxy  | 33398198 |
| rs4245739   | 1   | 204518842 | A           | C          | 1.14                        | 4.90E-03 | AVL    | 33398198 |
| rs708723    | 1   | 205739266 | C           | T          | 1.07                        | 1.78E-04 | AVL    | 33398198 |
| rs9287719   | 2   | 10781975  | C           | T          | 1.05                        | 6.37E-03 | Proxy  | 33398198 |
| rs9306894   | 2   | 20878105  | G           | A          | 1.13                        | 1.15E-10 | AVL    | 33398198 |
| rs7591218   | 2   | 43637998  | A           | G          | 1.13                        | 3.54E-09 | AVL    | 33398198 |
| rs13396048  | 2   | 62752975  | G           | A          | 1.15                        | 5.01E-12 | Proxy  | 33398198 |
| rs2028900   | 2   | 85767735  | T           | T          | 1.09                        | 5.32E-06 | AVL    | 33398198 |
| rs13419301  | 2   | 121103598 | C           | T          | 1.11                        | 5.78E-09 | Proxy  | 33398198 |
| rs67560433  | 2   | 121373466 | C           | T          | 1.05                        | 1.64E-02 | Proxy  | 33398198 |
| rs16854905  | 2   | 169012955 | C           | T          | 1.08                        | 5.07E-04 | AVL    | 33398198 |
| rs77167534  | 2   | 173319930 | C           | T          | 1.17                        | 1.04E-10 | AVL    | 33398198 |
| rs6743068   | 2   | 202126615 | G           | A          | 1.06                        | 8.31E-03 | Proxy  | 33398198 |
| rs2292884   | 2   | 238443226 | G           | A          | 1.07                        | 7.72E-04 | AVL    | 33398198 |
| rs2074840   | 2   | 242141719 | C           | T          | 1.06                        | 3.78E-02 | AVL    | 33398198 |
| rs13385191  | 2   | 20888265  | G           | A          | 1.15                        | 7.50E-08 | N/C    | 20676098 |
| rs7622860   | 3   | 18738940  | A           | C          | 1.08                        | 3.55E-05 | Proxy  | 33398198 |
| rs7618603   | 3   | 23153062  | A           | C          | 1.10                        | 7.49E-04 | AVL    | 33398198 |
| rs143745027 | 3   | 87144017  | G           | A          | 1.20                        | 3.00E-13 | AVL    | 33398198 |
| rs7628934   | 3   | 87175984  | C           | T          | 1.10                        | 8.82E-07 | AVL    | 33398198 |
| rs1283104   | 3   | 106962521 | G           | C          | 1.04                        | 2.67E-02 | AVL    | 33398198 |
| rs1567780   | 3   | 113300183 | T           | C          | 1.09                        | 7.97E-04 | Proxy  | 33398198 |
| rs2811476   | 3   | 127898501 | C           | A          | 1.14                        | 4.86E-07 | AVL    | 33398198 |
| rs35006112  | 3   | 128213994 | G           | A          | 1.13                        | 4.05E-11 | AVL    | 33398198 |
| rs201683    | 3   | 137562823 | G           | T          | 1.06                        | 5.39E-03 | Proxy  | 33398198 |
| rs7650602   | 3   | 141147414 | C           | T          | 1.08                        | 1.49E-04 | AVL    | 33398198 |
| rs2293607   | 3   | 169482335 | T           | C          | 1.05                        | 8.43E-03 | AVL    | 33398198 |
| rs2055109   | 3   | 87467332  | C           | T          | 1.21                        | 3.94E-08 | N/C    | 22366784 |
| rs73862213  | 3   | 128217499 | G           | A          | 1.31                        | 5.87E-23 | AVL    | 31562322 |
| rs13122786  | 4   | 95544718  | C           | T          | 1.06                        | 3.21E-03 | Proxy  | 33398198 |
| rs7679673   | 4   | 106061534 | C           | A          | 1.07                        | 2.02E-03 | AVL    | 33398198 |
| rs17035310  | 4   | 106064754 | C           | T          | 1.18                        | 4.68E-03 | AVL    | 33398198 |
| rs77821238  | 4   | 140948835 | C           | T          | 1.11                        | 9.80E-03 | AVL    | 33398198 |
| rs147762399 | 4   | 152030340 | T           | C          | 1.07                        | 1.37E-03 | AVL    | 33398198 |
| rs2242652   | 5   | 1280028   | G           | A          | 1.16                        | 6.83E-15 | AVL    | 33398198 |
| rs2672843   | 5   | 177891551 | G           | A          | 1.08                        | 1.15E-02 | AVL    | 33398198 |
| rs12653946  | 5   | 1895829   | T           | C          | 1.26                        | 3.90E-18 | AVL    | 20676098 |
| rs7773037   | 6   | 21330689  | C           | T          | 1.10                        | 4.72E-07 | Proxy  | 33398198 |
| rs9469899   | 6   | 34793124  | A           | G          | 1.06                        | 8.48E-03 | AVL    | 33398198 |
| rs4714485   | 6   | 41536587  | G           | T          | 1.15                        | 2.62E-12 | AVL    | 33398198 |
| rs6453845   | 6   | 76495882  | T           | G          | 1.09                        | 3.81E-05 | Proxy  | 33398198 |
| rs339351    | 6   | 117200434 | C           | A          | 1.22                        | 8.13E-23 | AVL    | 33398198 |
| rs13215045  | 6   | 153447516 | C           | T          | 1.07                        | 6.22E-04 | AVL    | 33398198 |
| rs963800    | 6   | 160150279 | C           | T          | 1.09                        | 6.38E-06 | AVL    | 33398198 |
| rs1983891   | 6   | 41536427  | T           | C          | 1.15                        | 7.60E-08 | N/C    | 20676098 |
| rs339331    | 6   | 117210052 | T           | C          | 1.22                        | 1.60E-12 | N/C    | 20676098 |
| rs12155172  | 7   | 20999211  | A           | G          | 1.07                        | 1.82E-03 | Proxy  | 33398198 |
| rs6956484   | 7   | 27564862  | A           | C          | 1.14                        | 3.80E-04 | AVL    | 33398198 |
| rs10486567  | 7   | 27976563  | G           | A          | 1.10                        | 1.13E-03 | AVL    | 33398198 |
| rs12701838  | 7   | 40877473  | A           | G          | 1.21                        | 1.82E-03 | AVL    | 33398198 |
| rs869170    | 7   | 47451918  | G           | A          | 1.04                        | 3.46E-02 | Proxy  | 33398198 |
| rs6955627   | 7   | 92577760  | C           | T          | 1.07                        | 7.68E-04 | AVL    | 33398198 |
| rs870167    | 8   | 8498803   | G           | A          | 1.07                        | 1.87E-03 | AVL    | 33398198 |
| rs11135749  | 8   | 23470785  | T           | G          | 1.11                        | 1.98E-03 | Proxy  | 33398198 |
| rs1160267   | 8   | 23529521  | G           | A          | 1.27                        | 2.10E-40 | AVL    | 33398198 |

|             |    |           |   |   |      |          |       |          |
|-------------|----|-----------|---|---|------|----------|-------|----------|
| rs12677206  | 8  | 26063165  | A | C | 1.10 | 2.64E-06 | AVL   | 33398198 |
| rs7463326   | 8  | 128027954 | G | A | 1.27 | 4.19E-25 | AVL   | 33398198 |
| rs72725879  | 8  | 128103969 | T | C | 1.71 | 9.48E-29 | AVL   | 33398198 |
| rs62516012  | 8  | 128342866 | C | G | 1.18 | 4.10E-04 | Proxy | 33398198 |
| rs6983267   | 8  | 128413305 | G | T | 1.15 | 2.91E-13 | AVL   | 33398198 |
| rs10090154  | 8  | 128532137 | T | C | 1.61 | 3.88E-06 | AVL   | 33398198 |
| rs817872    | 9  | 110144887 | C | T | 1.07 | 4.39E-04 | N/C   | 33398198 |
| rs7047271   | 9  | 132573536 | T | C | 1.08 | 1.46E-04 | Proxy | 33398198 |
| rs817826    | 9  | 110156300 | C | T | 1.41 | 5.45E-14 | AVL   | 23023329 |
| rs10993994  | 10 | 51549496  | T | C | 1.18 | 1.34E-18 | AVL   | 33398198 |
| rs11817544  | 10 | 80236999  | C | A | 1.17 | 2.21E-12 | AVL   | 33398198 |
| rs12412705  | 10 | 80835998  | C | T | 1.11 | 7.44E-10 | N/C   | 33398198 |
| rs1935581   | 10 | 90195149  | C | T | 1.05 | 6.45E-03 | AVL   | 33398198 |
| rs12262998  | 10 | 104428716 | C | T | 1.08 | 2.19E-02 | AVL   | 33398198 |
| rs4558107   | 10 | 122794926 | A | G | 1.08 | 2.19E-03 | AVL   | 33398198 |
| rs140783917 | 10 | 122834482 | C | T | 1.22 | 4.30E-14 | AVL   | 33398198 |
| rs2252004   | 10 | 122844709 | G | T | 1.16 | 1.98E-08 | N/C   | 22366784 |
| rs4554825   | 10 | 80244623  | C | T | 1.14 | 8.43E-12 | N/C   | 31562322 |
| rs11002805  | 10 | 80825897  | A | G | 1.16 | 5.28E-20 | Proxy | 31562322 |
| rs61890184  | 11 | 7547587   | A | G | 1.15 | 7.50E-07 | AVL   | 33398198 |
| rs1048374   | 11 | 58902679  | G | A | 1.15 | 6.22E-09 | N/C   | 33398198 |
| rs17450692  | 11 | 76267331  | C | T | 1.08 | 3.45E-03 | Proxy | 33398198 |
| rs878987    | 11 | 134266372 | G | A | 1.11 | 4.21E-02 | AVL   | 33398198 |
| rs12791447  | 11 | 7556577   | C | T | 1.23 | 3.59E-08 | N/C   | 26443449 |
| rs7968403   | 12 | 65012824  | T | C | 1.08 | 1.58E-03 | AVL   | 33398198 |
| rs67026445  | 12 | 90156377  | T | C | 1.12 | 1.55E-06 | Proxy | 33398198 |
| rs77121786  | 12 | 102446675 | G | T | 1.06 | 1.28E-02 | AVL   | 33398198 |
| rs1270884   | 12 | 114685571 | A | G | 1.07 | 8.21E-03 | AVL   | 33398198 |
| rs1327653   | 13 | 51076440  | T | C | 1.10 | 2.17E-04 | AVL   | 33398198 |
| rs9600079   | 13 | 73728139  | T | G | 1.18 | 2.80E-09 | AVL   | 20676098 |
| rs12882923  | 14 | 37136194  | G | A | 1.10 | 1.63E-05 | Proxy | 33398198 |
| rs8006682   | 14 | 69134264  | C | G | 1.07 | 1.11E-02 | Proxy | 33398198 |
| rs58262369  | 14 | 64693912  | C | T | 1.28 | 3.05E-10 | AVL   | 26443449 |
| rs11561564  | 15 | 40965044  | G | A | 1.06 | 8.14E-03 | AVL   | 33398198 |
| rs730708    | 15 | 66942093  | T | C | 1.11 | 2.81E-11 | proxy | 31562322 |
| rs410157    | 17 | 618965    | T | C | 1.07 | 1.69E-04 | Proxy | 33398198 |
| rs3110641   | 17 | 36047417  | A | G | 1.08 | 2.66E-05 | AVL   | 33398198 |
| rs11649743  | 17 | 36074979  | G | A | 1.15 | 9.14E-13 | AVL   | 33398198 |
| rs11651052  | 17 | 36103565  | G | A | 1.31 | 9.68E-39 | Proxy | 33398198 |
| rs8089411   | 18 | 51771322  | C | T | 1.07 | 3.10E-03 | AVL   | 33398198 |
| rs11876000  | 18 | 73035513  | T | G | 1.04 | 4.10E-02 | AVL   | 33398198 |
| rs4802297   | 19 | 38738130  | G | C | 1.06 | 3.47E-03 | AVL   | 33398198 |
| rs2659051   | 19 | 51345568  | G | C | 1.14 | 3.39E-13 | AVL   | 33398198 |
| rs103294    | 19 | 54797848  | C | T | 1.28 | 5.34E-16 | AVL   | 23023329 |
| rs73909841  | 20 | 49548807  | T | C | 1.20 | 9.21E-06 | AVL   | 33398198 |
| rs3787099   | 20 | 62307517  | A | G | 1.16 | 8.87E-03 | AVL   | 33398198 |
| rs5759167   | 22 | 43500212  | G | T | 1.09 | 1.09E-05 | AVL   | 33398198 |
| rs138708    | 22 | 39138332  | G | A | 1.20 | 1.13E-15 | AVL   | 31562322 |
| rs960417    | X  | 9811095   | A | G | 1.04 | 4.51E-02 | AVL   | 33398198 |
| rs5972255   | X  | 30896320  | T | C | 1.04 | 2.64E-02 | AVL   | 33398198 |
| rs4826594   | X  | 54454406  | A | G | 1.07 | 7.13E-09 | AVL   | 31562322 |

Abbreviation: CHR, chromosome; Ref. Reference.

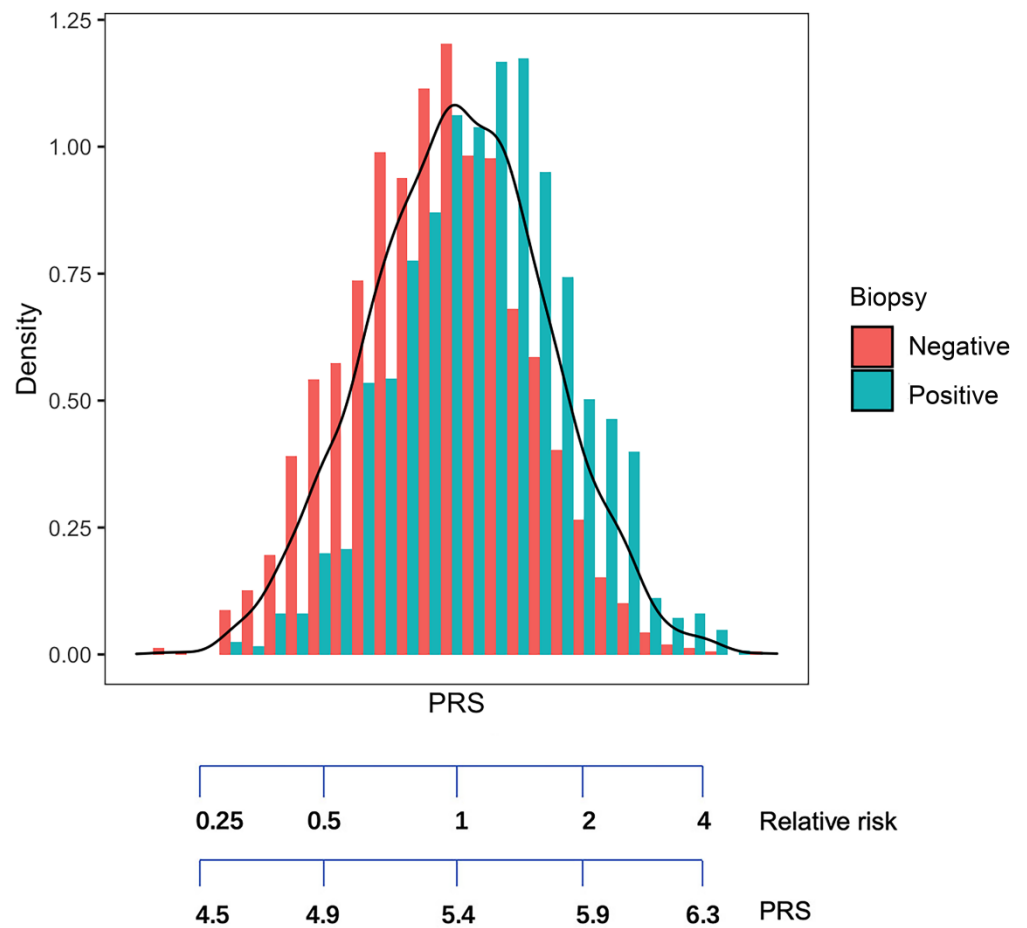

**Figure S1.** The PRS distribution in patients undergoing prostate biopsy.

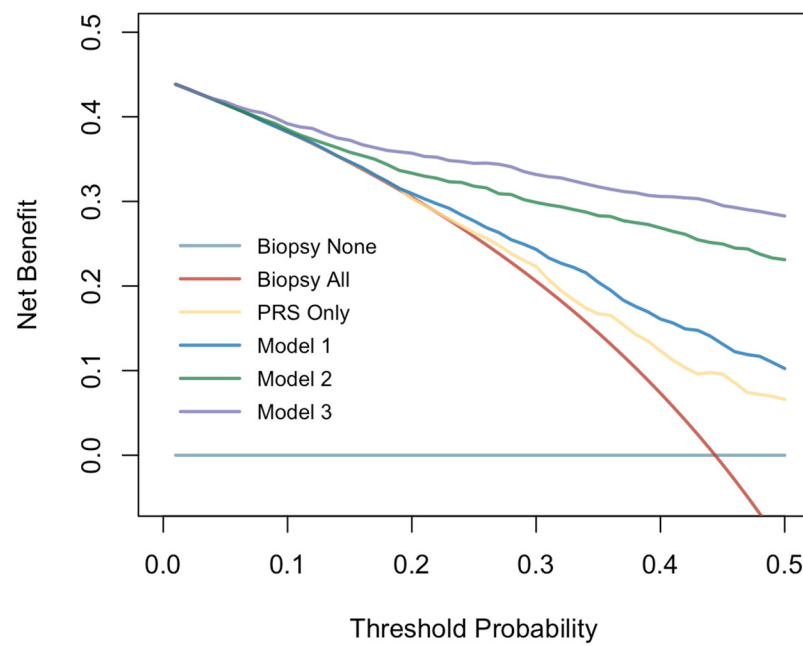

**Figure S2.** DCA curves of three different clinical risk model with PRS. \*Model 1: Age + FH; Model 2: Age + FH + log(PV) + log(PSA) + log( %fPSA); Model3: Age + FH + log(PV) + log(phi).

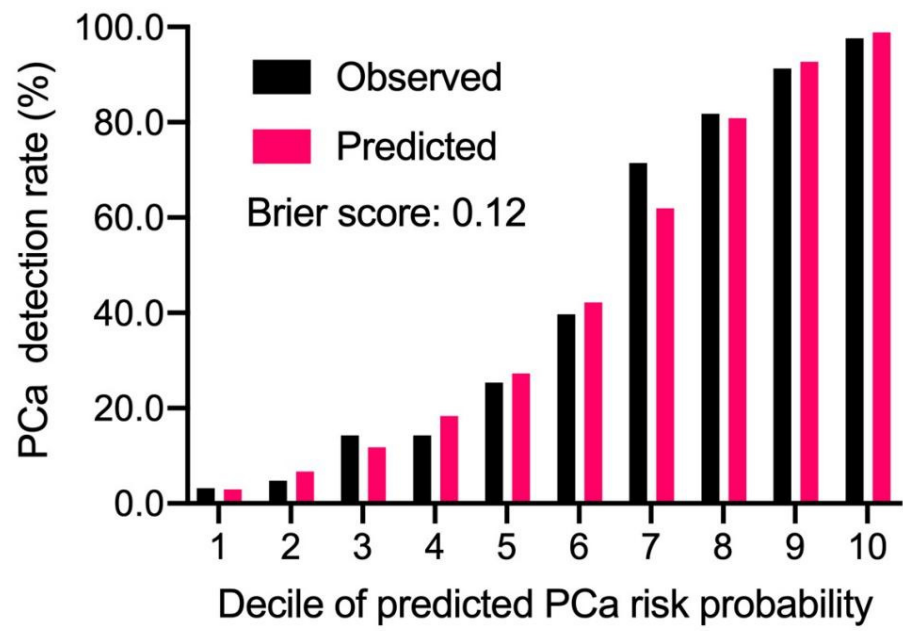

Figure S3. Calibration histogram of  $\phi$ -mediated model.
